# Supplementary material for: Flux-assisted single crystal growth and heteroepitaxy of perovskite-type mixed-metal borohydrides
Source: Royal Society of Chemistry journal article supplement (doi:10.1039/c5ce00135h), 2015-01-01
Supplement: c5ce00135h1.pdf [file c5ce00135h1.pdf]

# Flux-assisted single crystal growth and heteroepitaxy of perovskite-type mixed-metal borohydrides

Pascal Schouwink,<sup>a</sup> Adrien Ramel,<sup>b</sup> Enrico Giannini,<sup>b</sup> and Radovan Černý<sup>a</sup>

<sup>a</sup> Laboratory of Crystallography, DQMP Department of Quantum Matter Physics, University of Geneva, Quai Ernest-Ansermet 24, 1211 Geneva 4, Switzerland.

<sup>b</sup> DQMP Department of Quantum Matter Physics, University of Geneva, Quai Ernest-Ansermet 24, 1211 Geneva 4, Switzerland.

## Supplementary Information

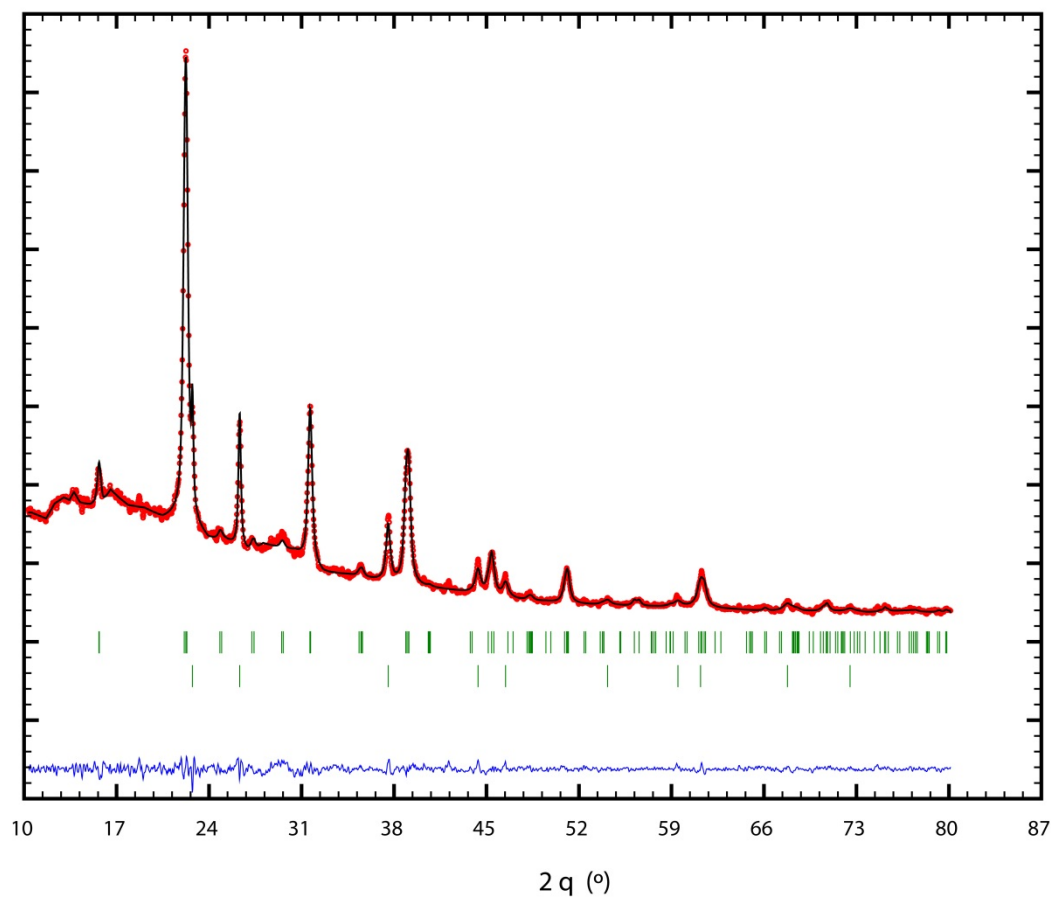

**Supplementary Fig. 1** Rietveld plot for ball milled sample  $\text{LiBH}_4\text{-Ca}(\text{BH}_4)_2\text{-KBH}_4$ , measured at room temperature. *hkl* ticks, from top to bottom:  $\text{KCa}(\text{BH}_4)_3$ ,  $\text{KBH}_4$ . The quantitative analysis yield 76 mol%  $\text{KCa}(\text{BH}_4)_3$  and 24 mol%  $\text{KBH}_4$ . The Gaussian profile parameters were refined per phase and one additional mixing parameter for  $\text{KCa}(\text{BH}_4)_3$  to allow for Lorentzian lineshape.

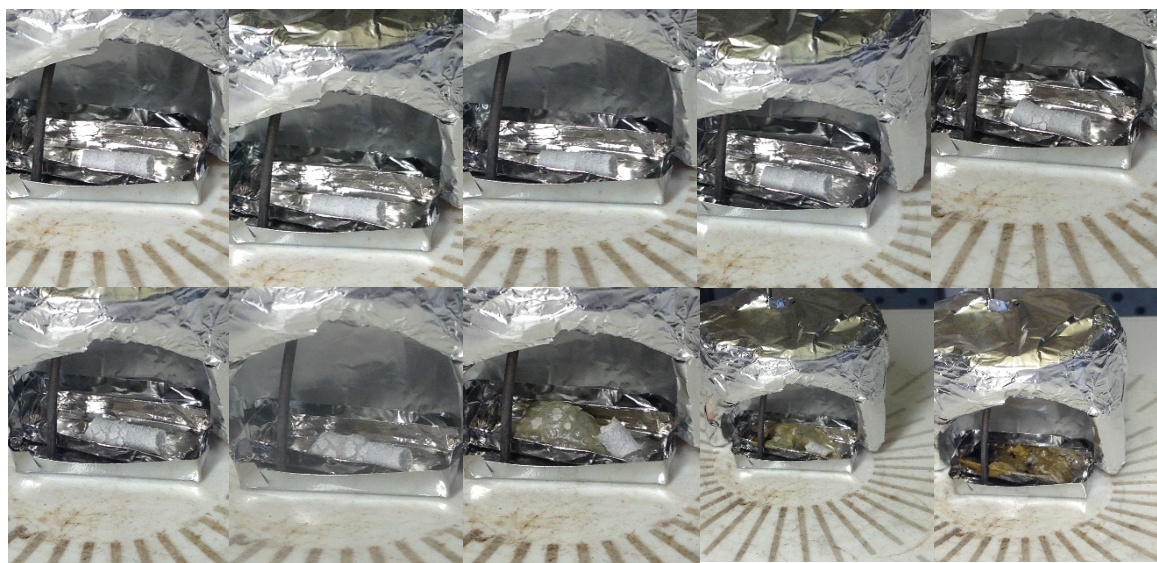

**Supplementary Fig. 2** Pellet composed of 50 vol% solvent (left half) and 50 vol% sample  $\text{KCa}(\text{BH}_4)_3$  (right). From left to right, top to bottom: 298 K, 423 K, 473 K, 493 K, 503 K, 513 K, 523 K, 543 K, 553 K, 573 K.

### Sample preparation for flux-melting

Three different compositional mixtures eutectic mixture :  $\text{KCa}(\text{BH}_4)_3$  were prepared, to investigate the effect of volume and molar excess on the melting behaviour.

Molar ratio 1:1, excess sample volume of  $\text{KCa}(\text{BH}_4)_3$ :

The sample decomposed at 593 K. This means that the melting point of  $\text{KCa}(\text{BH}_4)_3$  was lowered due to the eutectic with respect to 618 K, but decomposition still present. No single crystals were found in the molar mixture 1:1, also not at the final operating temperature of 513 K.

Molar ratio 8.6:1.4, same sample volumes:

Two pellets used, to study influence of solvent on the sample (Fig. 1 and Supplementary Fig. 2). Single crystals found at synthesis attempts at 513 K.

Molar ratio 9:1, excess sample volume of eutectic mixture:

Single crystals found at experiments run at 513 K.
